# Supplementary material
Source: PubMed Central journal article supplement (PMC7836609)
Supplement: mmc1.pdf [file mmc1.pdf]

# THE LANCET

## Microbe

### **Supplementary appendix**

This appendix formed part of the original submission. We post it as supplied by the authors.

Supplement to: Ma Z, Li P, Ji Y, et al. Cross-reactivity towards SARS-CoV-2: the potential role of low-pathogenic human coronaviruses. *Lancet Microbe* 2020; **1**: e151.

## Appendix to

### Cross-reactivity towards SARS-CoV-2: the potential role of low-pathogenic human coronaviruses

Zhongren Ma, Pengfei Li, Yuepeng Ji, Aqsa Ikram, Qiuwei Pan\*

q.pan@erasmusmc.nl

Key Laboratory of Biotechnology and Bioengineering of State Ethnic Affairs Commission, Biomedical Research Center, Northwest Minzu University, Lanzhou, China (ZM, YJ, AI, QP); and Department of Gastroenterology and Hepatology, Erasmus MC University Medical Center, Rotterdam, Netherlands (PL, YJ, QP)

*Lancet Microbe*

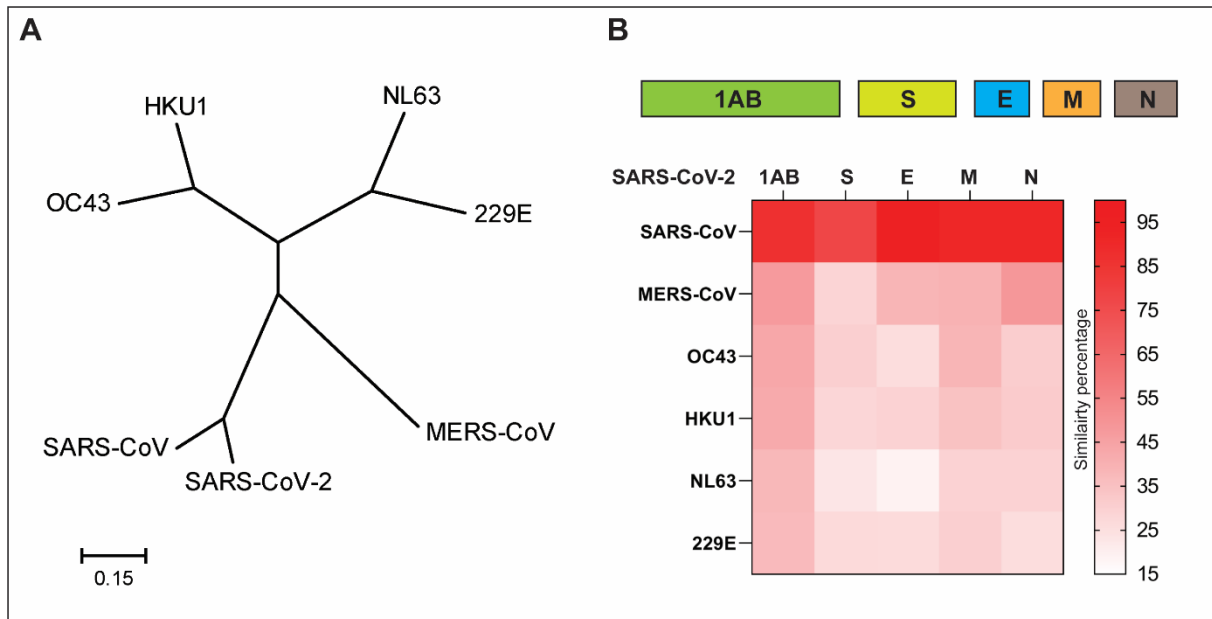

**Figure. Genetic affinity between SARS-CoV-2 and low pathogenic human coronaviruses (LPH-CoV).** (A) Phylogenetic tree based on reference genomes of SARS-CoV-2 (Genbank: MN908947), SARS-CoV (AY278488), MERS-CoV (KJ813439), OC43 (KX344031), 229E (KY369908), NL63 (MK334046) and HKU1 (KT779555). (B) Sequence similarities of the common viral proteins between SARS-CoV-2 and SARS-CoV, MERS-CoV or LPH-CoV (229E, NL63, OC43 or HKU1). The polyprotein 1AB, and spike (S), membrane (M), envelop (E) and nucleocapsid (N) proteins are indicated.
